# Supplementary material
Source: PubMed Central journal article supplement (PMC8011983)
Supplement: pr0c00383_si_001.pdf [file pr0c00383_si_001.pdf]

# In silico drug repurposing for SARS-CoV-2 Main Proteinase and Spike proteins

*Irene Maffucci<sup>1,\*</sup>, Alessandro Contini<sup>2,\*</sup>*

<sup>1</sup>Université de technologie de Compiègne, UPJV, CNRS, Enzyme and Cell Engineering, Centre  
de recherche Royallieu - CS 60 319 - 60 203 Compiègne Cedex

<sup>2</sup>Università degli Studi di Milano, Dipartimento di Scienze Farmaceutiche, Sezione di Chimica  
Generale e Organica “A. Marchesini”, Via Venezian, 21 20133 Milano, Italy

## Index

Figure S1. RMSD of the RBD-hACE2 complex backbone atoms from the X-ray structure (code PDB 6M0J) during the 20 ns MD simulation. .... S3

Table S1. Difference in the binding free energies between the mutated and the native RBD-hACE2 complex obtained from the alanine scanning performed on the last 10 ns of the MD simulation of the complex by individually mutating the RBD residues at the interface with hACE2. The numbering has been kept in according to the X-ray structure. .... S3

Table S2. Compounds selected by docking on M<sup>pro</sup> (6LU7 model) that failed during the MD/Nwat-MMGBSA rescoring step. .... S4

Table S3. Compounds selected by docking on M<sup>pro</sup> (QHD43415 homology model) that failed during the MD/Nwat-MMGBSA rescoring step..... S6

Table S4. Hydrogen bonds between RBD and hACE2 during the last half of the 20 ns MD simulation. Cut-offs of 3.5 Å and 150° have been used. The average donor-acceptor distances (AvgDist) are reported in Å and the average donor-donorH-acceptor angles are reported in degrees. .... S7

Figure S2. Superposition of thymopentin docked to RBD BS2 (light green) and the PEPFOLD3 structure prediction (dark green). The backbone RMSD between the two structures is 1.3 Å. ... S8

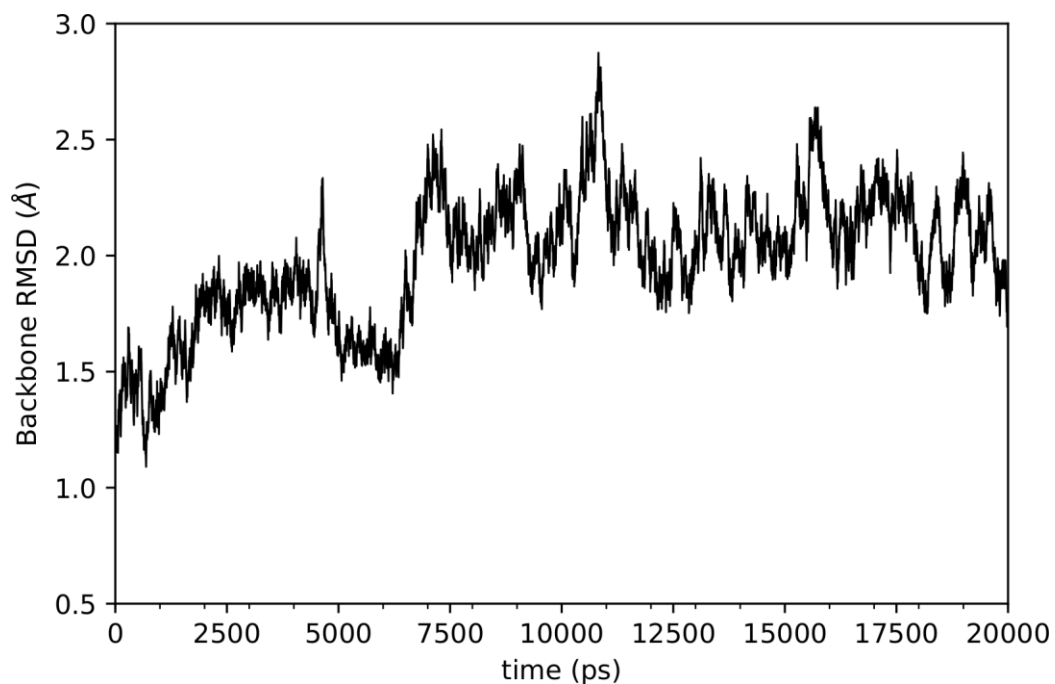

Figure S1. RMSD of the RBD-hACE2 complex backbone atoms from the X-ray structure (code PDB 6M0J) during the 20 ns MD simulation.

Table S1. Difference in the binding free energies between the mutated and the native RBD-hACE2 complex obtained from the alanine scanning performed on the last 10 ns of the MD simulation of the complex by individually mutating the RBD residues at the interface with hACE2. The numbering has been kept in according to the X-ray structure.

| #Residue | $\Delta\Delta G$ (kcal/mol) | Standard deviation (kcal/mol) |
|----------|-----------------------------|-------------------------------|
| R403     | 0.22                        | 0.25                          |
| K417     | 2.23                        | 2.17                          |
| Y449     | 2.74                        | 1.35                          |
| Y453     | 0.10                        | 0.60                          |
| L455     | 3.00                        | 0.73                          |
| F456     | 3.57                        | 1.06                          |

|      |       |      |
|------|-------|------|
| Y473 | 0.40  | 0.24 |
| S477 | 0.22  | 1.55 |
| T478 | -0.07 | 0.10 |
| E484 | -0.11 | 0.12 |
| F486 | 4.45  | 1.55 |
| N487 | 4.02  | 1.49 |
| Y489 | 3.29  | 0.72 |
| F490 | -0.09 | 0.05 |
| L492 | 0.07  | 0.03 |
| Q493 | 4.75  | 1.89 |
| S494 | 0.06  | 0.08 |
| Y495 | -0.08 | 0.05 |
| Q498 | 9.13  | 3.43 |
| T500 | 2.58  | 1.27 |
| N501 | 4.25  | 1.44 |
| V503 | -0.01 | 0.09 |
| Y505 | 4.64  | 1.81 |

Table S2. Compounds selected by docking on M<sup>pro</sup> (6LU7 model) that failed during the MD/Nwat-MMGBSA rescoring step.

| Drug Name    | Dock score | MD/Nwat-MMGBSA |
|--------------|------------|----------------|
| Nafarelin    | -155.4     | F              |
| Leuprorelin  | -145.6     | F              |
| Leuprorelin  | -140.9     | F              |
| Somatostatin | -139.6     | F              |
| Icatibant    | -139.3     | F              |

---

|                         |        |   |
|-------------------------|--------|---|
| Nystatin                | -132.7 | F |
| Goserelin               | -128.8 | F |
| Alarelin                | -128.5 | F |
| Gonadorelin             | -125.5 | F |
| Amphotericin B          | -124.7 | F |
| Carfilzomib             | -122.4 | F |
| Thymopentin             | -121.2 | F |
| Lentinan                | -116.4 | F |
| Ritonavir               | -116.1 | F |
| NAD <sup>+</sup>        | -114.1 | F |
| Octreotide              | -113.6 | F |
| Colistin                | -113.5 | F |
| Cangrelor               | -111.6 | F |
| Oxytocin                | -111.4 | F |
| Flucytosine             | -111.3 | F |
| Echinacoside            | -110.3 | F |
| Monomethyl auristatin E | -110.2 | F |
| Salmeterol              | -110.1 | F |
| Daptomycin              | -109.9 | F |
| Pneumocandin B0         | -109.6 | F |
| Caspofungin             | -109.1 | F |
| Vilanterol              | -109.1 | F |
| Stachyose               | -108.2 | F |
| Ginsenoside Rb1         | -108.1 | F |
| Venetoclax              | -107.7 | F |
| Terlipressin            | -106.7 | F |
| Lopinavir               | -106.7 | F |

---

|                       |        |   |
|-----------------------|--------|---|
| Atracurium besylate   | -106.5 | F |
| Polymyxin B           | -106.5 | F |
| Deferoxamine mesylate | -106.2 | F |
| Darunavir             | -105.9 | F |

Table S3. Compounds selected by docking on M<sup>pro</sup> (QHD43415 homology model) that failed during the MD/Nwat-MMGBSA rescoring step.

| Drug Name      | Dock score | MD/Nwat-MMGBSA |
|----------------|------------|----------------|
| Gonadorelin    | -131.4     | F              |
| Leuprorelin    | -127.9     | F              |
| Nafarelin      | -127.9     | F              |
| Leuprorelin    | -124.1     | F              |
| Goserelin      | -117.8     | F              |
| Bacitracin     | -117.0     | F              |
| Amphotericin B | -115.2     | F              |
| Alarelin       | -114.6     | F              |
| Deferoxamine   | -113.7     | F              |
| Nystatin       | -112.8     | F              |
| Octreotide     | -108.0     | F              |
| Carfilzomib    | -107.7     | F              |
| Terlipressin   | -107.3     | F              |
| Somatostatin   | -106.5     | F              |
| Flucytosine    | -106.4     | F              |
| Lypressin      | -106.3     | F              |
| Sennoside A    | -105.6     | F              |
| Colistin       | -103.9     | F              |

|                               |        |   |
|-------------------------------|--------|---|
| Polymyxin B                   | -103.3 | F |
| Nelfinavir                    | -102.7 | F |
| Madecassoside                 | -102.5 | F |
| Asiaticoside                  | -102.4 | F |
| Pneumocandin B0               | -102.4 | F |
| Stevioside                    | -101.4 | F |
| Thymopentin                   | -100.4 | F |
| Tenofovir Disoproxil Fumarate | -100.3 | F |
| Lapatinib                     | -99.3  | F |
| Octreotide                    | -99.2  | F |
| Desmopressin                  | -99.1  | F |
| NAD+                          | -98.5  | F |

---

Table S4. Hydrogen bonds between RBD and hACE2 during the last half of the 20 ns MD simulation. Cut-offs of 3.5 Å and 150° have been used. The average donor-acceptor distances (AvgDist) are reported in Å and the average donor-donorH-acceptor angles are reported in degrees.

| #Acceptor   | DonorH       | Donor       | Frac   | AvgDist | AvgAng   |
|-------------|--------------|-------------|--------|---------|----------|
| LYS_353@O   | GLY_502@H    | GLY_502@N   | 0.9026 | 2.8952  | 164.4105 |
| ASN_487@OD1 | TYR_83@HH    | TYR_83@OH   | 0.6796 | 2.7777  | 162.7078 |
| ASP_355@OD2 | THR_500@HG1  | THR_500@OG1 | 0.5978 | 2.7536  | 163.9769 |
| GLU_35@OE2  | GLN_493@HE22 | GLN_493@NE2 | 0.5772 | 2.88    | 164.7713 |
| ASP_38@OD1  | TYR_449@HH   | TYR_449@OH  | 0.4672 | 2.721   | 164.7831 |
| ASP_38@OD2  | TYR_449@HH   | TYR_449@OH  | 0.4454 | 2.7187  | 164.3915 |
| ASP_38@OD2  | GLN_498@HE22 | GLN_498@NE2 | 0.4424 | 2.9078  | 164.7138 |
| ASP_38@OD1  | GLN_498@HE22 | GLN_498@NE2 | 0.3782 | 2.8983  | 164.6202 |

|             |              |             |        |        |          |
|-------------|--------------|-------------|--------|--------|----------|
| GLU_37@OE2  | TYR_505@HH   | TYR_505@OH  | 0.3434 | 2.7076 | 163.8788 |
| GLU_35@OE1  | GLN_493@HE22 | GLN_493@NE2 | 0.2426 | 2.8978 | 164.91   |
| TYR_41@OH   | THR_500@HG1  | THR_500@OG1 | 0.2272 | 2.8517 | 163.2088 |
| ASP_30@OD2  | LYS_417@HZ3  | LYS_417@NZ  | 0.218  | 2.774  | 162.3672 |
| ASP_30@OD2  | LYS_417@HZ1  | LYS_417@NZ  | 0.2116 | 2.7782 | 161.6638 |
| GLN_498@OE1 | LYS_353@HZ3  | LYS_353@NZ  | 0.1462 | 2.8426 | 161.4818 |
| GLN_498@OE1 | LYS_353@HZ2  | LYS_353@NZ  | 0.1402 | 2.8527 | 161.641  |
| ASP_30@OD2  | LYS_417@HZ2  | LYS_417@NZ  | 0.1324 | 2.7924 | 162.3512 |
| GLN_498@OE1 | LYS_353@HZ1  | LYS_353@NZ  | 0.1298 | 2.8405 | 161.1518 |
| GLN_493@OE1 | LSY_31@HZ1   | LSY_31@NZ   | 0.1262 | 2.8247 | 162.1882 |
| GLN_493@OE1 | LSY_31@HZ3   | LSY_31@NZ   | 0.1252 | 2.8188 | 161.9295 |
| GLU_37@OE1  | TYR_505@HH   | TYR_505@OH  | 0.1176 | 2.7326 | 163.3618 |
| GLN_493@OE1 | LSY_31@HZ2   | LSY_31@NZ   | 0.1168 | 2.8314 | 162.1823 |
| GLN_24@OE1  | ASN_487@HD21 | ASN_487@ND2 | 0.1118 | 2.9744 | 159.9545 |
| GLN_24@OE1  | SER_477@H    | SER_477@N   | 0.1114 | 2.9675 | 163.4158 |

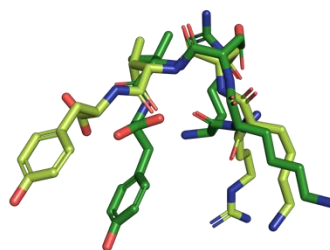

Figure S2. Superposition of thymopentin docked to RBD BS2 (light green) and the PEPFOLD3 structure prediction (dark green). The backbone RMSD between the two structures is 1.3 Å.
